# Supplementary material for: Sequence features responsible for intron retention in human
Source: PubMed Central journal article supplement (PMC1831480; doi:10.1186/1471-2164-8-59), 2007-02-26
Supplement: 1471-2164-8-59-S3.pdf [file 1471-2164-8-59-S3.pdf]

## Additional File 3

### Analysis of gene expression

#### *a. Correlation between expression levels and expression breadth*

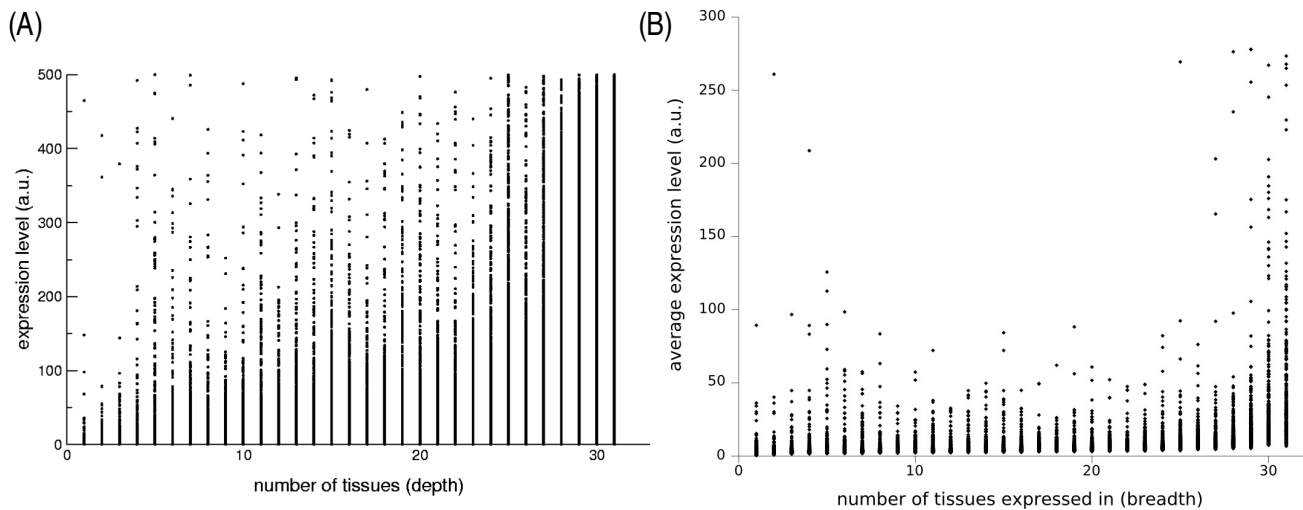

Figure S1. Correlation between gene expression level and the number of tissues they are expressed in (breadth); the higher the breadth, the higher the expression level. (A) All normalized SAGE frequencies from all libraries of all genes (15953 genes with SAGE tag in the database) in the database are plotted, (B) average frequencies of all libraries were plotted. Similar results were obtained separately for genes with low-RIF, high-RIF and housekeeping genes.

## ***b. Analysis of global gene expression***

For the analysis of gene expression levels in intron retaining, housekeeping and all genes presented in Supplementary Tables S1-S3, for a given group of genes (*e.g.* housekeeping genes), all genes in the group had their normalized expression levels determined in all libraries available for a given tissue (“n” values). The global expression level of a given group of genes for a given tissue was then taken as all “n” values together.

To compare the expression level per tissue, a bootstrap-like procedure was performed. The null hypothesis was that both the set of experimental (low and high RIF) expression levels and the set of expression levels of all genes for a given tissue had the same means. Ten thousand random subsets of the size of the experimental group were generated from the set of expression levels of all genes and had their mean expression levels compared to that of the experimental set. If the expression was different than (higher or lower, depending on the tissue) or equal to that of the experimental set, the counter was increased by 1. Expression levels of tissues were considered different when at most 5% of the random subsets compared had expression level higher than or equal that of the experimental set.

Table S1. Comparison of global expression levels (arbitrary units) estimated by SAGE (see Materials and Methods) of housekeeping genes and all genes, per tissue. The column “n” shows how many expression measurements were counted, thus each cell represents the number of genes × the number of libraries they are expressed in. Bootstrap comparisons that yielded differences in < 5% of the random sets ( $P < 0.05$ ) are shown in red (statistically significant difference, 31/31 tissues).

| Tissue                 | housekeeping |                                      | all genes |                                      | P-value            |
|------------------------|--------------|--------------------------------------|-----------|--------------------------------------|--------------------|
|                        | n            | expression level (a.u.)<br>mean ± sd | n         | expression level (a.u.)<br>mean ± sd |                    |
| bone marrow            | 726          | 40.2 ± 67.6                          | 13305     | 14.6 ± 31.5                          | < 10 <sup>-4</sup> |
| bone                   | 160          | 43.0 ± 67.2                          | 3370      | 15.8 ± 36.5                          | < 10 <sup>-4</sup> |
| brain                  | 13463        | 34.0 ± 56.4                          | 332771    | 12.0 ± 26.9                          | < 10 <sup>-4</sup> |
| cartilage              | 1853         | 35.3 ± 58.3                          | 38533     | 13.6 ± 32.4                          | < 10 <sup>-4</sup> |
| cerebellum             | 4807         | 34.4 ± 58.8                          | 110861    | 12.5 ± 27.3                          | < 10 <sup>-4</sup> |
| colon                  | 2313         | 40.8 ± 70.4                          | 46196     | 13.6 ± 30.0                          | < 10 <sup>-4</sup> |
| eye                    | 222          | 32.4 ± 62.5                          | 5395      | 9.7 ± 26.9                           | < 10 <sup>-4</sup> |
| gastrointestinal tract | 167          | 23.1 ± 36.7                          | 3081      | 11.4 ± 23.5                          | < 10 <sup>-4</sup> |
| heart                  | 191          | 38.2 ± 66.3                          | 4476      | 13.2 ± 34.5                          | < 10 <sup>-4</sup> |
| kidney                 | 751          | 40.6 ± 62.9                          | 14503     | 15.0 ± 29.8                          | < 10 <sup>-4</sup> |
| liver                  | 793          | 30.3 ± 52.8                          | 16638     | 13.1 ± 29.6                          | < 10 <sup>-4</sup> |
| lung                   | 1374         | 37.7 ± 63.0                          | 29168     | 14.3 ± 31.6                          | < 10 <sup>-4</sup> |
| lymph node             | 206          | 24.6 ± 53.7                          | 6340      | 9.2 ± 21.8                           | < 10 <sup>-4</sup> |
| mammary gland          | 8567         | 34.1 ± 55.6                          | 181819    | 14.4 ± 31.0                          | < 10 <sup>-4</sup> |
| muscle                 | 348          | 32.2 ± 54.7                          | 5883      | 15.0 ± 35.6                          | < 10 <sup>-4</sup> |
| other                  | 198          | 25.9 ± 59.7                          | 4779      | 10.0 ± 26.8                          | < 10 <sup>-4</sup> |
| ovary                  | 1583         | 42.8 ± 64.6                          | 31301     | 16.5 ± 32.1                          | < 10 <sup>-4</sup> |
| pancreas               | 1547         | 42.1 ± 67.7                          | 27007     | 18.9 ± 35.2                          | < 10 <sup>-4</sup> |
| peritoneum             | 387          | 34.5 ± 64.8                          | 7428      | 15.9 ± 33.4                          | < 10 <sup>-4</sup> |
| placenta               | 384          | 28.5 ± 57.5                          | 9916      | 10.4 ± 26.7                          | < 10 <sup>-4</sup> |
| prostate               | 2802         | 41.2 ± 66.7                          | 55032     | 15.2 ± 32.9                          | < 10 <sup>-4</sup> |
| retina                 | 634          | 25.2 ± 46.9                          | 16620     | 10.2 ± 24.1                          | < 10 <sup>-4</sup> |
| skin                   | 410          | 38.1 ± 64.7                          | 7118      | 19.6 ± 37.7                          | < 10 <sup>-4</sup> |
| spinal cord            | 197          | 32.7 ± 48.5                          | 4791      | 13.6 ± 27.2                          | < 10 <sup>-4</sup> |
| stem cell              | 2555         | 39.0 ± 67.8                          | 81368     | 8.7 ± 25.5                           | < 10 <sup>-4</sup> |
| stomach                | 1837         | 34.2 ± 57.8                          | 41658     | 13.4 ± 29.1                          | < 10 <sup>-4</sup> |
| thyroid                | 603          | 30.7 ± 61.3                          | 17463     | 9.7 ± 25.8                           | < 10 <sup>-4</sup> |
| uncharacterized tissue | 353          | 41.9 ± 60.6                          | 6578      | 19.1 ± 36.6                          | < 10 <sup>-4</sup> |
| uterus                 | 131          | 35.0 ± 58.9                          | 1695      | 22.1 ± 37.0                          | 0.0022             |
| vascular               | 1187         | 36.8 ± 66.2                          | 26377     | 13.2 ± 31.6                          | < 10 <sup>-4</sup> |
| white blood cells      | 2265         | 38.3 ± 66.3                          | 46703     | 14.2 ± 31.2                          | < 10 <sup>-4</sup> |

Table S2. Comparison of global expression levels (arbitrary units) estimated by SAGE (see Materials and Methods) of genes with low-RIF events and all genes, per tissue. The column “n” shows how many expression measurements were counted, thus each cell represents the number of genes  $\times$  the number of libraries they are expressed. Bootstrap comparisons that yielded differences in  $< 0.05$  random sets ( $P < 0.05$ ) are shown in red (statistically significant difference, 25/31 tissues).

| Tissue                 | low-RIF |                                          | all genes |                                          | P-value     |
|------------------------|---------|------------------------------------------|-----------|------------------------------------------|-------------|
|                        | n       | expression level (a.u.)<br>mean $\pm$ sd | n         | expression level (a.u.)<br>mean $\pm$ sd |             |
| bone marrow            | 1463    | 17.9 $\pm$ 38.3                          | 13305     | 14.6 $\pm$ 31.5                          | 0.0007      |
| bone                   | 413     | 19.0 $\pm$ 36.9                          | 3370      | 15.8 $\pm$ 36.5                          | 0.0608      |
| brain                  | 30432   | 14.5 $\pm$ 33.1                          | 332771    | 12.0 $\pm$ 26.9                          | $< 10^{-4}$ |
| cartilage              | 3871    | 15.9 $\pm$ 35.4                          | 38533     | 13.6 $\pm$ 32.4                          | 0.0002      |
| cerebellum             | 10303   | 15.6 $\pm$ 35.5                          | 110861    | 12.5 $\pm$ 27.3                          | $< 10^{-4}$ |
| colon                  | 5057    | 16.3 $\pm$ 35.6                          | 46196     | 13.6 $\pm$ 30.0                          | $< 10^{-4}$ |
| eye                    | 516     | 12.1 $\pm$ 31.9                          | 5395      | 9.7 $\pm$ 26.9                           | 0.0401      |
| gastrointestinal tract | 303     | 13.4 $\pm$ 28.7                          | 3081      | 11.4 $\pm$ 23.5                          | 0.111       |
| heart                  | 412     | 15.2 $\pm$ 33.7                          | 4476      | 13.2 $\pm$ 34.5                          | 0.1441      |
| kidney                 | 1496    | 17.9 $\pm$ 35.3                          | 14503     | 15.0 $\pm$ 29.8                          | 0.0011      |
| liver                  | 1545    | 15.7 $\pm$ 35.9                          | 16638     | 13.1 $\pm$ 29.6                          | 0.0014      |
| lung                   | 2987    | 17.0 $\pm$ 37.2                          | 29168     | 14.3 $\pm$ 31.6                          | $< 10^{-4}$ |
| lymph node             | 551     | 11.5 $\pm$ 27.2                          | 6340      | 9.2 $\pm$ 21.8                           | 0.0154      |
| mammary gland          | 18323   | 17.7 $\pm$ 36.9                          | 181819    | 14.4 $\pm$ 31.0                          | $< 10^{-4}$ |
| muscle                 | 635     | 14.9 $\pm$ 35.5                          | 5883      | 15.0 $\pm$ 35.6                          | 0.4899      |
| other                  | 490     | 12.4 $\pm$ 25.5                          | 4779      | 10.0 $\pm$ 26.8                          | 0.0427      |
| ovary                  | 3217    | 19.4 $\pm$ 38.1                          | 31301     | 16.5 $\pm$ 32.1                          | $< 10^{-4}$ |
| pancreas               | 3047    | 22.5 $\pm$ 42.0                          | 27007     | 18.9 $\pm$ 35.2                          | $< 10^{-4}$ |
| peritoneum             | 756     | 20.8 $\pm$ 42.2                          | 7428      | 15.9 $\pm$ 33.4                          | 0.0005      |
| placenta               | 817     | 11.8 $\pm$ 24.2                          | 9916      | 10.4 $\pm$ 26.7                          | 0.079       |
| prostate               | 5818    | 18.1 $\pm$ 37.9                          | 55032     | 15.2 $\pm$ 32.9                          | $< 10^{-4}$ |
| retina                 | 1474    | 13.5 $\pm$ 28.7                          | 16620     | 10.2 $\pm$ 24.1                          | $< 10^{-4}$ |
| skin                   | 730     | 23.7 $\pm$ 47.6                          | 7118      | 19.6 $\pm$ 37.7                          | 0.0077      |
| spinal cord            | 440     | 14.6 $\pm$ 25.5                          | 4791      | 13.6 $\pm$ 27.2                          | 0.2378      |
| stem cell              | 7102    | 11.2 $\pm$ 32.6                          | 81368     | 8.7 $\pm$ 25.5                           | $< 10^{-4}$ |
| stomach                | 3858    | 16.5 $\pm$ 37.5                          | 41658     | 13.4 $\pm$ 29.1                          | $< 10^{-4}$ |
| thyroid                | 1481    | 11.2 $\pm$ 28.5                          | 17463     | 9.7 $\pm$ 25.8                           | 0.03        |
| uncharacterized tissue | 658     | 25.1 $\pm$ 55.3                          | 6578      | 19.1 $\pm$ 36.6                          | 0.0011      |
| uterus                 | 192     | 31.7 $\pm$ 52.6                          | 1695      | 22.1 $\pm$ 37.0                          | 0.0043      |
| vascular               | 2547    | 15.4 $\pm$ 35.3                          | 26377     | 13.2 $\pm$ 31.6                          | 0.0012      |
| white blood cells      | 4970    | 18.3 $\pm$ 39.6                          | 46703     | 14.2 $\pm$ 31.2                          | $< 10^{-4}$ |

Table S3. Comparison of global expression levels (arbitrary units) estimated by SAGE (see Materials and Methods) of genes with high-RIF events and all genes, per tissue. The column “n” shows how many expression measurements were counted, thus each cell represents the number of genes  $\times$  the number of libraries they are expressed. Bootstrap comparisons that yielded differences in  $< 0.05$  random sets ( $P < 0.05$ ) are shown in red (statistically significant difference, 14/31 tissues).

| Tissue                 | high-RIF |                                          | all genes |                                          | P-value     |
|------------------------|----------|------------------------------------------|-----------|------------------------------------------|-------------|
|                        | n        | expression level (a.u.)<br>mean $\pm$ sd | n         | expression level (a.u.)<br>mean $\pm$ sd |             |
| bone marrow            | 300      | 20.1 $\pm$ 37.3                          | 13305     | 14.6 $\pm$ 31.5                          | 0.0058      |
| bone                   | 55       | 22.4 $\pm$ 34.5                          | 3370      | 15.8 $\pm$ 36.5                          | 0.1039      |
| brain                  | 6188     | 13.3 $\pm$ 29.7                          | 332771    | 12.0 $\pm$ 26.9                          | 0.0004      |
| cartilage              | 762      | 13.6 $\pm$ 25.9                          | 38533     | 13.6 $\pm$ 32.4                          | 0.507       |
| cerebellum             | 2153     | 16.7 $\pm$ 36.1                          | 110861    | 12.5 $\pm$ 27.3                          | $< 10^{-4}$ |
| colon                  | 923      | 16.4 $\pm$ 33.4                          | 46196     | 13.6 $\pm$ 30.0                          | 0.0053      |
| eye                    | 109      | 10.1 $\pm$ 17.7                          | 5395      | 9.7 $\pm$ 26.9                           | 0.3627      |
| gastrointestinal tract | 67       | 9.8 $\pm$ 10.6                           | 3081      | 11.4 $\pm$ 23.5                          | 0.3263      |
| heart                  | 81       | 12.1 $\pm$ 18.4                          | 4476      | 13.2 $\pm$ 34.5                          | 0.4383      |
| kidney                 | 298      | 18.4 $\pm$ 33.1                          | 14503     | 15.0 $\pm$ 29.8                          | 0.0342      |
| liver                  | 330      | 14.0 $\pm$ 28.6                          | 16638     | 13.1 $\pm$ 29.6                          | 0.275       |
| lung                   | 538      | 15.9 $\pm$ 32.8                          | 29168     | 14.3 $\pm$ 31.6                          | 0.1352      |
| lymph node             | 107      | 10.8 $\pm$ 19.9                          | 6340      | 9.2 $\pm$ 21.8                           | 0.1976      |
| mammary gland          | 3561     | 18.1 $\pm$ 40.5                          | 181819    | 14.4 $\pm$ 31.0                          | $< 10^{-4}$ |
| muscle                 | 118      | 10.7 $\pm$ 15.1                          | 5883      | 15.0 $\pm$ 35.6                          | 0.0756      |
| other                  | 97       | 11.9 $\pm$ 18.0                          | 4779      | 10.0 $\pm$ 26.8                          | 0.2227      |
| ovary                  | 644      | 20.4 $\pm$ 41.8                          | 31301     | 16.5 $\pm$ 32.1                          | 0.0036      |
| pancreas               | 549      | 21.3 $\pm$ 38.4                          | 27007     | 18.9 $\pm$ 35.2                          | 0.0655      |
| peritoneum             | 145      | 20.7 $\pm$ 46.1                          | 7428      | 15.9 $\pm$ 33.4                          | 0.0585      |
| placenta               | 197      | 10.4 $\pm$ 16.7                          | 9916      | 10.4 $\pm$ 26.7                          | 0.4504      |
| prostate               | 1094     | 18.5 $\pm$ 42.5                          | 55032     | 15.2 $\pm$ 32.9                          | 0.0014      |
| retina                 | 308      | 13.1 $\pm$ 34.9                          | 16620     | 10.2 $\pm$ 24.1                          | 0.0327      |
| skin                   | 153      | 18.9 $\pm$ 33.4                          | 7118      | 19.6 $\pm$ 37.7                          | 0.4424      |
| spinal cord            | 89       | 13.0 $\pm$ 26.3                          | 4791      | 13.6 $\pm$ 27.2                          | 0.4786      |
| stem cell              | 1453     | 15.1 $\pm$ 38.7                          | 81368     | 8.7 $\pm$ 25.5                           | $< 10^{-4}$ |
| stomach                | 803      | 13.9 $\pm$ 23.3                          | 41658     | 13.4 $\pm$ 29.1                          | 0.2995      |
| thyroid                | 306      | 12.4 $\pm$ 33.9                          | 17463     | 9.7 $\pm$ 25.8                           | 0.0466      |
| uncharacterized tissue | 133      | 25.4 $\pm$ 41.4                          | 6578      | 19.1 $\pm$ 36.6                          | 0.0391      |
| uterus                 | 34       | 30.0 $\pm$ 69.0                          | 1695      | 22.1 $\pm$ 37.0                          | 0.1286      |
| vascular               | 495      | 16.4 $\pm$ 36.2                          | 26377     | 13.2 $\pm$ 31.6                          | 0.0251      |
| white blood cells      | 929      | 16.0 $\pm$ 32.5                          | 46703     | 14.2 $\pm$ 31.2                          | 0.047       |

**c. cDNA clusters that present intron retention have more sequences**

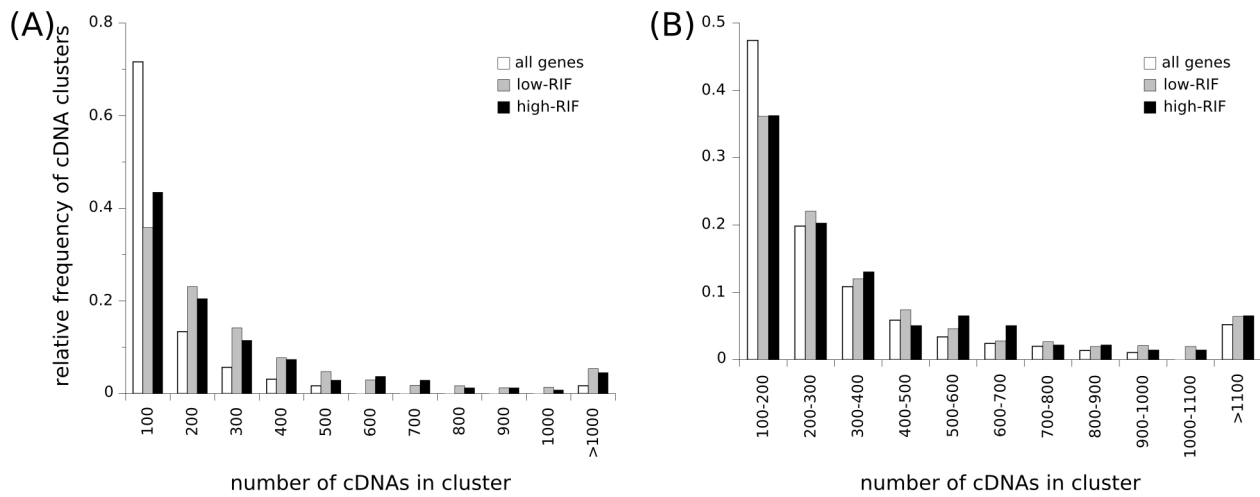

Figure S2 – Distribution of the number of cDNAs in low-RIF, high-RIF and all clusters. (A) Clusters presenting intron retention are larger. (B) The difference is not due to a paucity of small clusters showing intron retention, but still exists even considering only clusters with >100 cDNAs.
