# Supplementary material for: Sequence features responsible for intron retention in human
Source: PubMed Central journal article supplement (PMC1831480; doi:10.1186/1471-2164-8-59), 2007-02-26
Supplement: 1471-2164-8-59-S4.pdf [file 1471-2164-8-59-S4.pdf]

## Additional File 4

### Distribution of the frequency of ESE densities

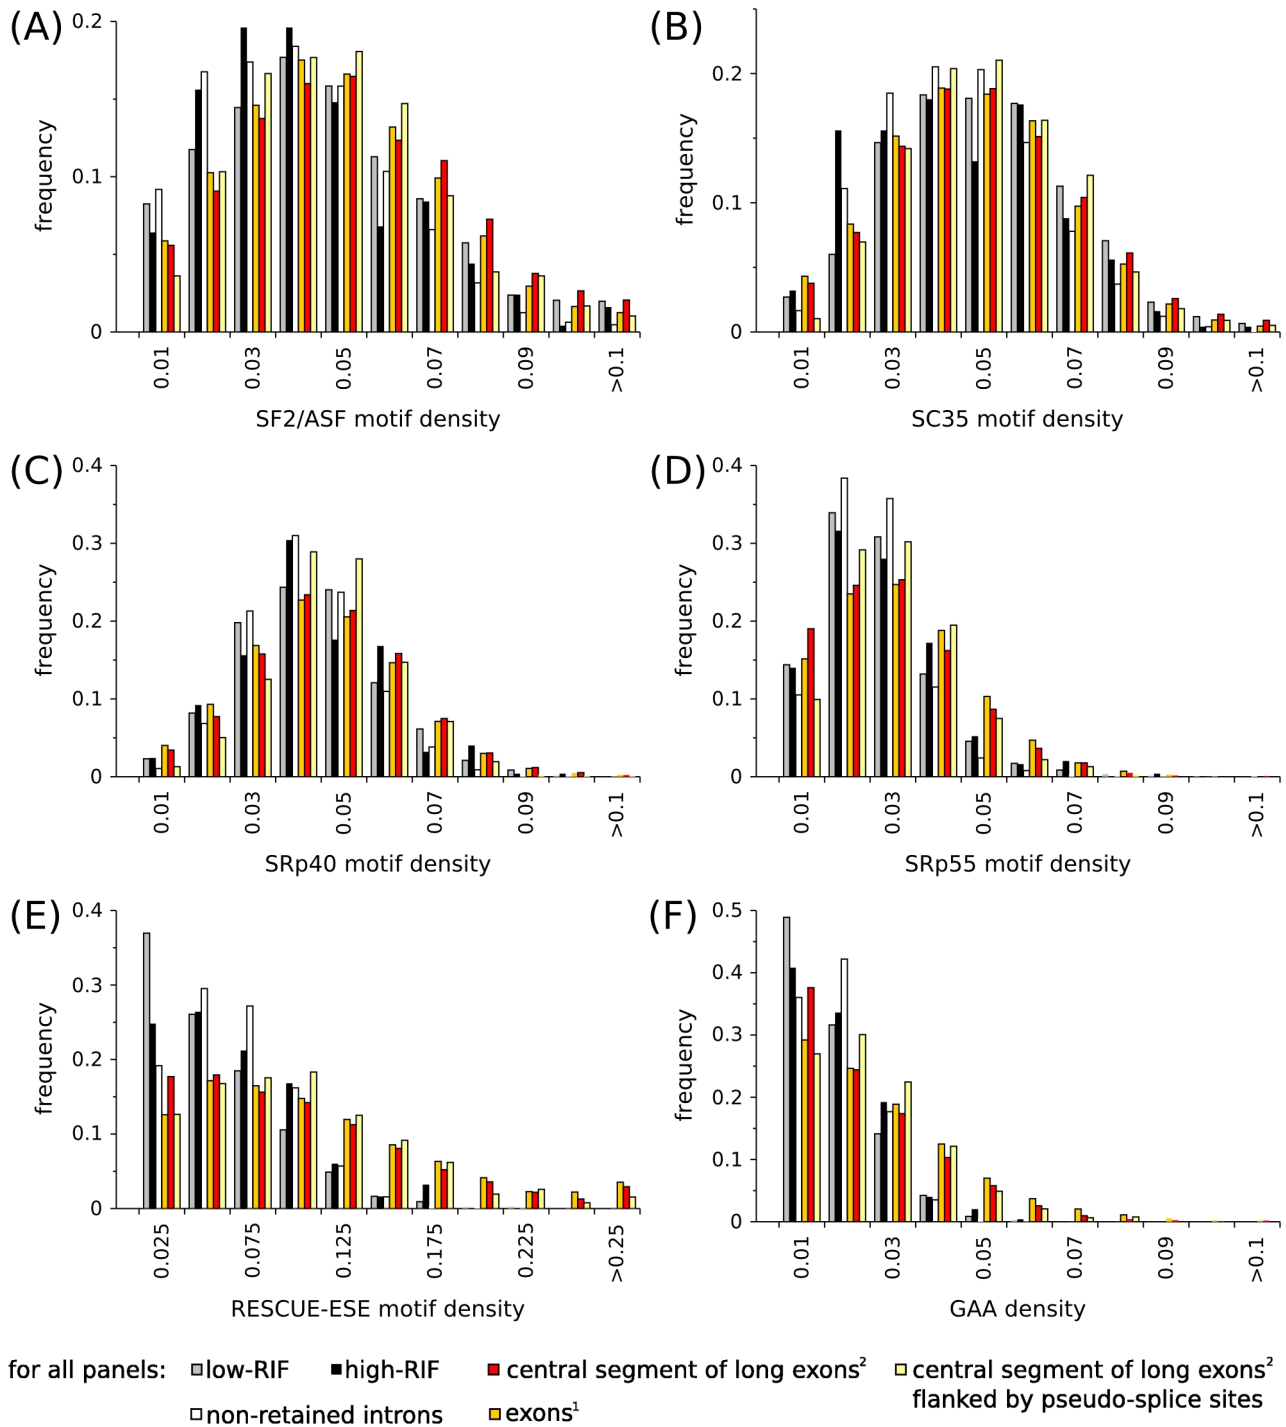

(legend in next page)

**Figure S1. Distribution of ESE motif densities in exon and intron data sets.**

The pattern of distribution of SELEX-ESE (Liu et al (1998), Liu et al (2000)) densities (A-D) differs from that of RESCUE-ESEs (Fairbrother et al, 2002, E) and GAA (F). This may be due to the fact that RESCUE-ESEs and GAA are purine-rich. SELEX-ESE densities (A-D) of retained and non-retained introns are not very different from those of exons, but the intron data sets seem to be slightly enriched with sequences with lower ESE densities, specially SF2/ASF (A) and SRp55 (D). In all panels, the central segment of long exons (pseudo-retained introns) and exons in general present very similar distributions of ESE frequencies, indicating that the differences observed in low and high-RIF retained introns are not related to a particularity of long exon architectures (see main text and Additional File 5).

<sup>1</sup> “Exons” correspond to the sets “all other exons” from the low and high-RIF groups in Table 3 together (7856 exons).

<sup>2</sup> The “central segments” or pseudo-retained introns were extracted from exons with length >300 and <600 nt (3207 exon segments, see main text and Additional File 5).

**References**

Fairbrother WG, Yeh RF, Sharp PA, Burge CB (2002) Predictive identification of exonic splicing enhancers in human genes. *Science* 297: 1007-1013.

Liu HX, Chew SL, Cartegni L, Zhang MQ, Krainer AR (2000) Exonic splicing enhancer motif recognized by human SC35 under splicing conditions. *Mol Cell Biol* 20: 1063-1071.

Liu HX, Zhang M, Krainer AR (1998) Identification of functional exonic splicing enhancer motifs recognized by individual SR proteins. *Genes Dev* 12: 1998-2012.
