# Supplementary material for: Sequence features responsible for intron retention in human
Source: PubMed Central journal article supplement (PMC1831480; doi:10.1186/1471-2164-8-59), 2007-02-26
Supplement: 1471-2164-8-59-S6.pdf [file 1471-2164-8-59-S6.pdf]

## Additional File 6

### Sequence logos of splice sites of retained introns conserved in mouse

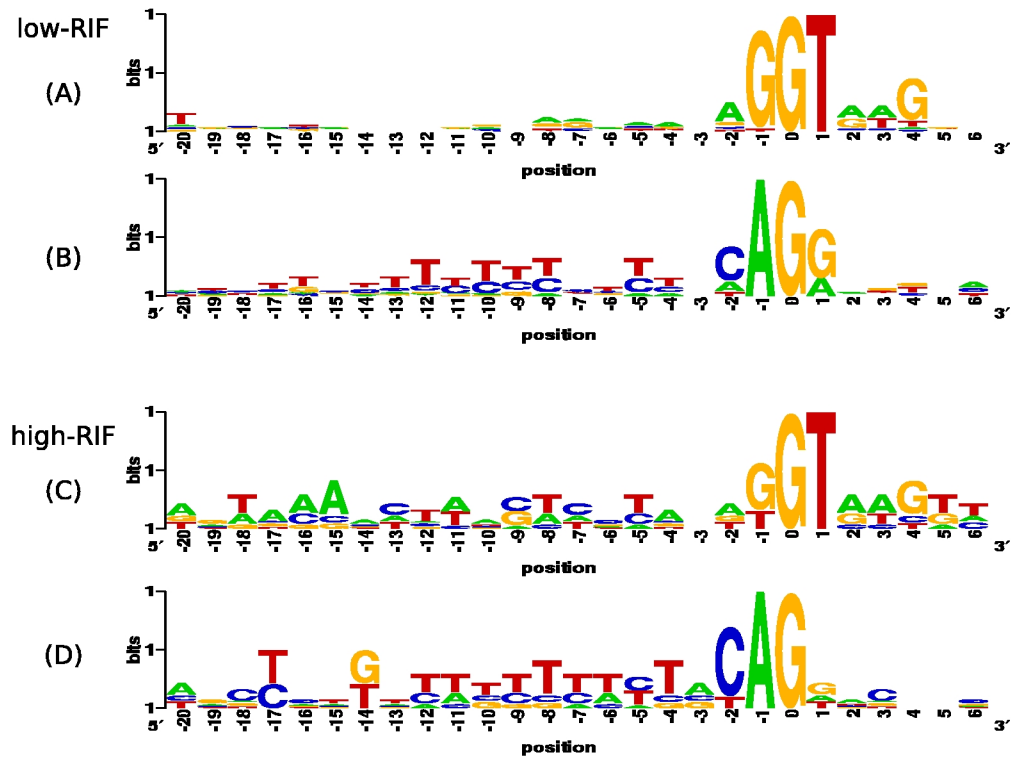

Figure S1. Sequence logos of retained introns conserved in mouse. (A) 22 5' splice sites and (B) 22 3' sites. (C) 7 5' sites and (D) 7 3' sites. All splice site pairs are GT..AG.
