# Supplementary material for: Sequence features responsible for intron retention in human
Source: PubMed Central journal article supplement (PMC1831480; doi:10.1186/1471-2164-8-59), 2007-02-26
Supplement: 1471-2164-8-59-S7.pdf [file 1471-2164-8-59-S7.pdf]

# Additional File 7

## Examples of intron retention events

Low-RIF

(A)

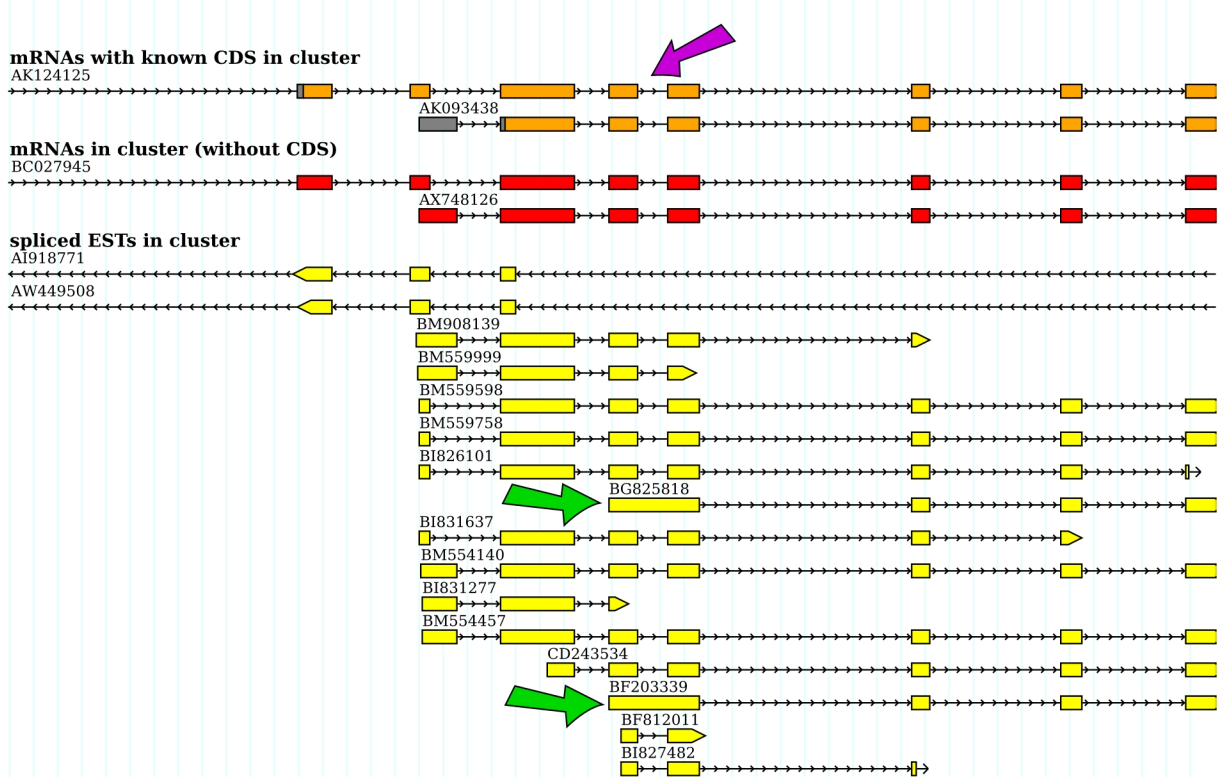

(B)

**mRNAs with known CDS in cluster**

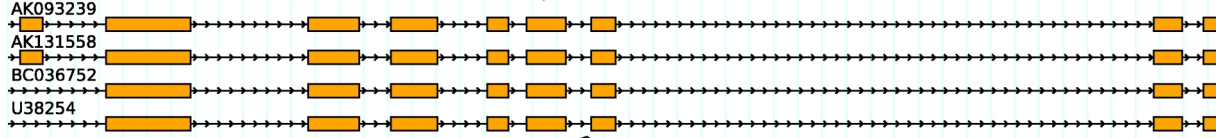

**mRNAs in cluster (without CDS)**

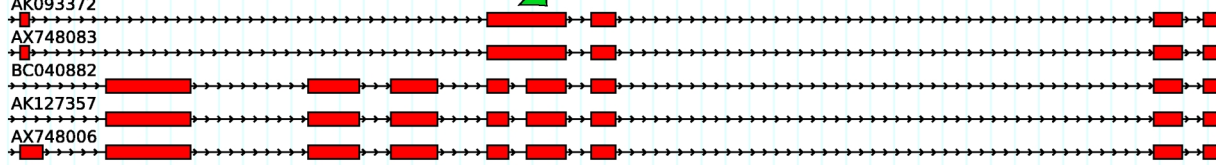

**spliced ESTs in cluster**

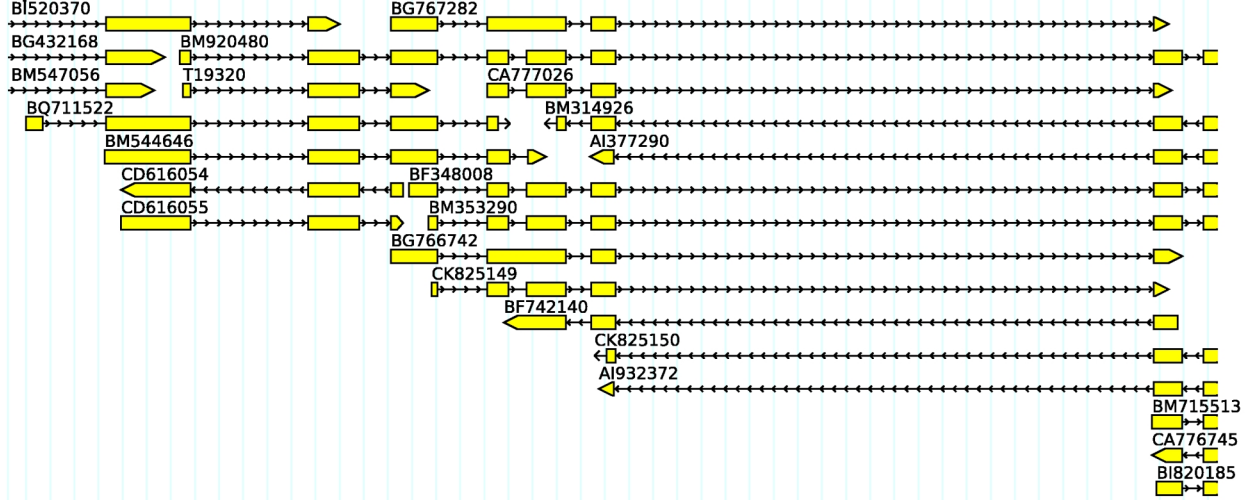

# High-RIF

(C)

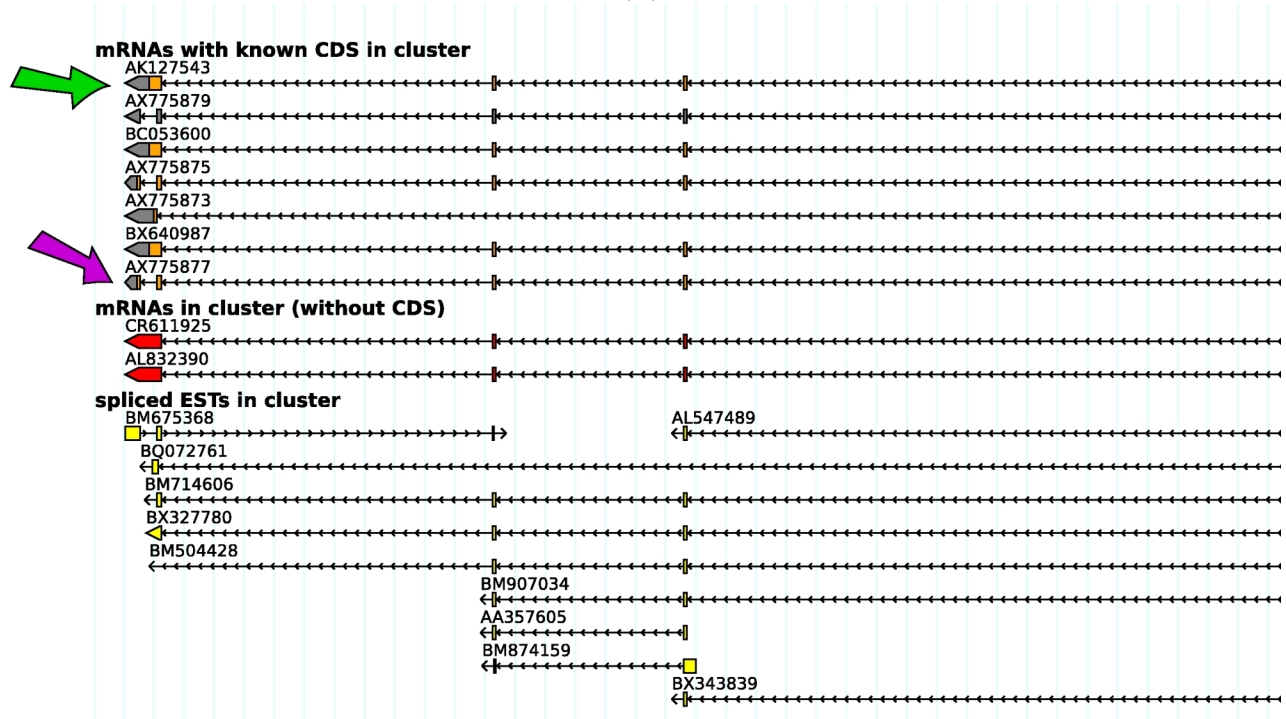

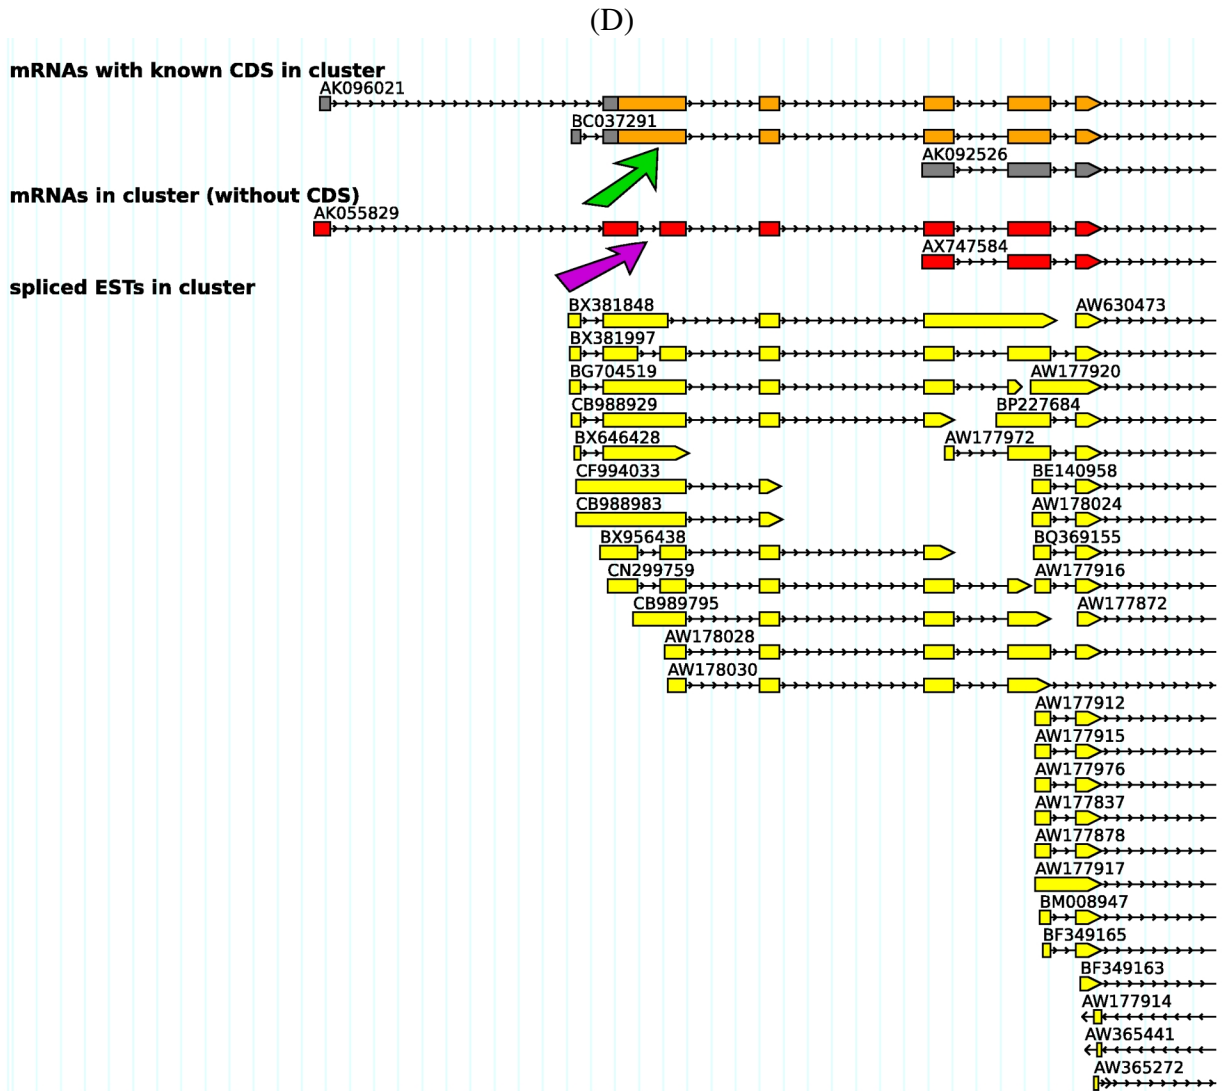

Figure S1. Examples of real IR events in different cDNA clusters. (A, B) Low-RIF events. (A) intron retention in the extremity of a cDNA (B) intron retention flanked by introns on both sides. (C, D) High-RIF events. Arrows point to intron retaining and intron defining cDNAs.
